# Supplementary material for: Contribution of Interleukin-10-592 (-590, -597) C>A Polymorphisms to Periodontitis Susceptibility: An Updated Meta-Analysis Based on 18 Case-Control Studies
Source: Hindawi journal article supplement (doi:10.1155/2018/2645963), 2018-09-19
Supplement: f1 [file 2645963.f1.pdf]

**e-TABLE 1.** Newcastle-Ottawa quality assessment scores for the studies included in the meta-analysis.

| Author(Year)                      | Selection | Comparability | Exposure | NOS | Quality  |
|-----------------------------------|-----------|---------------|----------|-----|----------|
| Scarel-Caminage (2004)[16]        | ★★★       | ★★            | ★★       | 7/9 | High     |
| Sumer(2007)[17]                   | ★★★★★     | ★★            | ★★       | 8/9 | High     |
| Claudino(2008)[18]                | ★★★       | ★             | ★★       | 6/9 | Moderate |
| Reichert(2008)[19]                | ★★★★★     | -             | ★★       | 6/9 | Moderate |
| Hu(2009)[20]                      | ★★★       | -             | ★★       | 5/9 | Moderate |
| Li(2009)[21]                      | ★★★       | ★             | ★★       | 6/9 | Moderate |
| Atanasovska-Stojanovska(2012)[22] | ★★★       | ★★            | ★★       | 7/9 | High     |
| Garlet(2012)[23]                  | ★★★       | ★★            | ★★       | 7/9 | High     |
| Jaradat(2012)[24]                 | ★★★       | ★★            | ★★       | 7/9 | High     |
| Scapoli(2012)[25]                 | ★★★       | -             | ★★       | 5/9 | Moderate |
| Scapoli(2015)[26]                 | ★★★       | ★             | ★★       | 6/9 | Moderate |
| Silveira(2016)[27]                | ★★★       | ★             | ★★       | 6/9 | Moderate |
| Gorgun(2017)[29]                  | ★★★       | ★★            | ★★       | 7/9 | High     |
| Lopes(2017)[28]                   | ★★        | -             | ★★       | 4/9 | Moderate |
| Toker(2017)[30]                   | ★★★       | ★★            | ★★       | 7/9 | High     |
| Zhang(2017)[31]                   | ★★★★★     | -             | ★★       | 6/9 | Moderate |
| Moudi(2018)[32]                   | ★★★       | ★★            | ★★       | 7/9 | High     |
| Toker(2018)[33]                   | ★★★       | ★★            | ★★       | 7/9 | High     |

**e-TABLE 2.** Sensitivity analysis\* for the A allele vs. C allele model and CP risk.

| Author(Year)                              | OR   | 95%CI     | <i>P</i> | <i>I</i> <sup>2</sup> | <i>P</i> for <i>I</i> <sup>2</sup> |
|-------------------------------------------|------|-----------|----------|-----------------------|------------------------------------|
| All authors                               | 1.38 | 1.17-1.64 | 0.002    | 62                    | 0.0005                             |
| Omitted Atanasovska-Stojanovska(2012)[22] | 1.44 | 1.23-1.69 | <0.00001 | 52                    | 0.009                              |
| Omitted Claudino(2008)[18]                | 1.36 | 1.14-1.63 | 0.0007   | 63                    | 0.0005                             |
| Omitted Garlet(2012)[23]                  | 1.36 | 1.14-1.63 | 0.0008   | 62                    | 0.0008                             |
| Omitted Hu(2009)[20]                      | 1.42 | 1.18-1.69 | 0.0002   | 64                    | 0.0005                             |
| Omitted Jaradat(2012)[24]                 | 1.35 | 1.14-1.61 | 0.0006   | 62                    | 0.0008                             |
| Omitted Lopes(2017)[28]                   | 1.33 | 1.13-1.57 | 0.0006   | 57                    | 0.03                               |
| Omitted Moudi(2018)[32]                   | 1.43 | 1.20-1.70 | <0.0001  | 60                    | 0.001                              |
| Omitted Reichert(2008)[19]                | 1.41 | 1.19-1.69 | <0.0001  | 63                    | 0.0005                             |
| Omitted Scapoli(2012)[25]                 | 1.39 | 1.15-1.67 | 0.0005   | 65                    | 0.0003                             |
| Omitted Scapoli(2015)[26]                 | 1.41 | 1.18-1.69 | 0.0002   | 63                    | 0.0006                             |
| Omitted Scarel-Caminage (2004)[16]        | 1.37 | 1.15-1.63 | 0.0004   | 64                    | 0.0004                             |
| Omitted Silveira(2016)[27]                | 1.40 | 1.17-1.67 | 0.0002   | 64                    | 0.0003                             |
| Omitted Sumer(2007)[17]                   | 1.33 | 1.13-1.57 | 0.0005   | 57                    | 0.003                              |
| Omitted Toker(2017)[30]                   | 1.37 | 1.15-1.64 | 0.0004   | 64                    | 0.0003                             |
| Omitted Toker(2018)[33]                   | 1.37 | 1.15-1.64 | 0.0004   | 64                    | 0.0003                             |
| Omitted Zhang(2017)[31]                   | 1.40 | 1.17-1.68 | 0.0003   | 64                    | 0.0007                             |

\* The sensitivity analysis was performed through the sequential omission of each study.

**e-TABLE 3.** Sensitivity analysis\* for the AA vs. AC +CC model and CP risk.

| Author(Year)                              | OR   | 95%CI        | <i>P</i> | <i>I</i> <sup>2</sup> % | <i>P</i> for <i>I</i> <sup>2</sup> |
|-------------------------------------------|------|--------------|----------|-------------------------|------------------------------------|
| All authors                               | 1.49 | 1.06- 2.10   | 0.02     | 59                      | 0.001                              |
| Omitted Atanasovska-Stojanovska(2012)[22] | 1.60 | 1.15- 2.23   | 0.005    | 55                      | 0.006                              |
| Omitted Claudino(2008)[18]                | 1.51 | 1.04- 2.20   | 0.03     | 62                      | 0.0007                             |
| Omitted Garlet(2012)[23]                  | 1.53 | 1.04- 2.24   | 0.03     | 62                      | 0.0007                             |
| Omitted Hu(2009)[20]                      | 1.51 | 1.03- 2.22   | 0.04     | 62                      | 0.0008                             |
| Omitted Jaradat(2012)[24]                 | 1.44 | 1.02- 2.05   | 0.04     | 60                      | 0.001                              |
| Omitted Lopes(2017)[28]                   | 1.46 | 1.01- 2.09   | 0.04     | 61                      | 0.001                              |
| Omitted Moudi(2018)[32]                   | 1.61 | [1.14-2.26]  | 0.006    | 53                      | 0.008                              |
| Omitted Reichert(2008)[19]                | 1.52 | 1.07- 2.14   | 0.02     | 62                      | 0.0009                             |
| Omitted Scapoli(2012)[25]                 | 1.49 | 1.03- 2.17   | 0.03     | 62                      | 0.0008                             |
| Omitted Scapoli(2015)[26]                 | 1.53 | 1.05- 2.22   | 0.03     | 62                      | 0.0008                             |
| Omitted Scarel-Caminage (2004)[16]        | 1.54 | 1.09-2.18    | 0.01     | 61                      | 0.001                              |
| Omitted Silveira(2016)[27]                | 1.55 | 1.08- 2.21   | 0.02     | 61                      | 0.001                              |
| Omitted Sumer(2007)[17]                   | 1.42 | 1.02- 1.97   | 0.04     | 57                      | 0.003                              |
| Omitted Toker(2017)[30]                   | 1.38 | [1.00- 1.91] | 0.05     | 54                      | 0.007                              |
| Omitted Toker(2018)[33]                   | 1.37 | 1.00-1.86    | 0.05     | 51                      | 0.01                               |
| Omitted Zhang(2017)[31]                   | 1.52 | 1.04-2.21    | 0.04     | 62                      | 0.0008                             |

\* The sensitivity analysis was performed through the sequential omission of each study.

**e-TABLE 4.** Sensitivity analysis\* for the CC vs. AA + AC model and CP risk.

| Author(Year)                              | OR   | 95%CI      | <i>P</i> | <i>I</i> <sup>2</sup> % | <i>P</i> for <i>I</i> <sup>2</sup> |
|-------------------------------------------|------|------------|----------|-------------------------|------------------------------------|
| All authors                               | 0.69 | 0.51-0.92  | 0.01     | 68                      | <0.0001                            |
| Omitted Atanasovska-Stojanovska(2012)[22] | 0.65 | 0.48- 0.87 | 0.004    | 65                      | 0.0002                             |
| Omitted Claudino(2008)[18]                | 0.72 | 0.53- 0.97 | 0.03     | 68                      | <0.0001                            |
| Omitted Garlet(2012)[23]                  | 0.72 | 0.53- 0.97 | 0.03     | 65                      | 0.0002                             |
| Omitted Hu(2009)[20]                      | 0.64 | 0.48- 0.86 | 0.003    | 66                      | 0.0002                             |
| Omitted Jaradat(2012)[24]                 | 0.70 | 0.52-0.96  | 0.02     | 70                      | <0.0001                            |
| Omitted Lopes(2017)[28]                   | 0.71 | 0.54- 0.93 | 0.01     | 65                      | 0.0002                             |
| Omitted Moudi(2018)[32]                   | 0.69 | 0.51-0.94  | 0.02     | 70                      | <0.0001                            |
| Omitted Reichert(2008)[19]                | 0.67 | 0.49- 0.89 | 0.007    | 69                      | <0.0001                            |
| Omitted Scapoli(2012)[25]                 | 0.69 | 0.50- 0.95 | 0.02     | 70                      | <0.0001                            |
| Omitted Scapoli(2015)[26]                 | 0.67 | 0.48- 0.92 | 0.01     | 68                      | <0.0001                            |
| Omitted Scarel-Caminage (2004)[16]        | 0.72 | 0.53-0.96  | 0.03     | 68                      | <0.0001                            |
| Omitted Silveira(2016)[27]                | 0.68 | 0.50- 0.93 | 0.02     | 70                      | <0.0001                            |
| Omitted Sumer(2007)[17]                   | 0.72 | 0.54- 0.97 | 0.03     | 67                      | <0.0001                            |
| Omitted Toker(2017)[30]                   | 0.67 | 0.50- 0.89 | 0.006    | 69                      | <0.0001                            |
| Omitted Toker(2018)[33]                   | 0.66 | 0.49-0.88  | 0.005    | 68                      | <0.0001                            |
| Omitted Zhang(2017)[31]                   | 0.67 | 0.49-0.91  | 0.01     | 70                      | <0.0001                            |

\* The sensitivity analysis was performed through the sequential omission of each study.
